# Supplementary material for: OER catalytic performance of a composite catalyst comprising multi-layer thin flake Co3O4 and PPy nanofibers
Source: Royal Society of Chemistry journal article supplement (doi:10.1039/d3ra05936g), 2023-01-01
Supplement: d3ra05936g1.pdf [file d3ra05936g1.pdf]

## Supporting information

### Composite Catalyst of Multi-Layer Thin Flake $\text{Co}_3\text{O}_4$ and PPy Nanofibers: Outstanding OER Catalytic Performance

Honglin Ai, Liquan Fan\*, Yuwei Wang\*, Ziteng Wang, Juan Zhao, Haiming Zhang, Meiyue Jiao, Boyu Lv, Xianxin Han

College of Materials Science and Engineering, Heilongjiang Provincial Key Laboratory of Polymeric Composite Materials, Qiqihar University, No.42, Wenhua Street, Qiqihar 161006, PR China

\*E-mail: [Liquan\\_Fan@163.com](mailto:Liquan_Fan@163.com); [wyy032378@163.com](mailto:wyy032378@163.com)

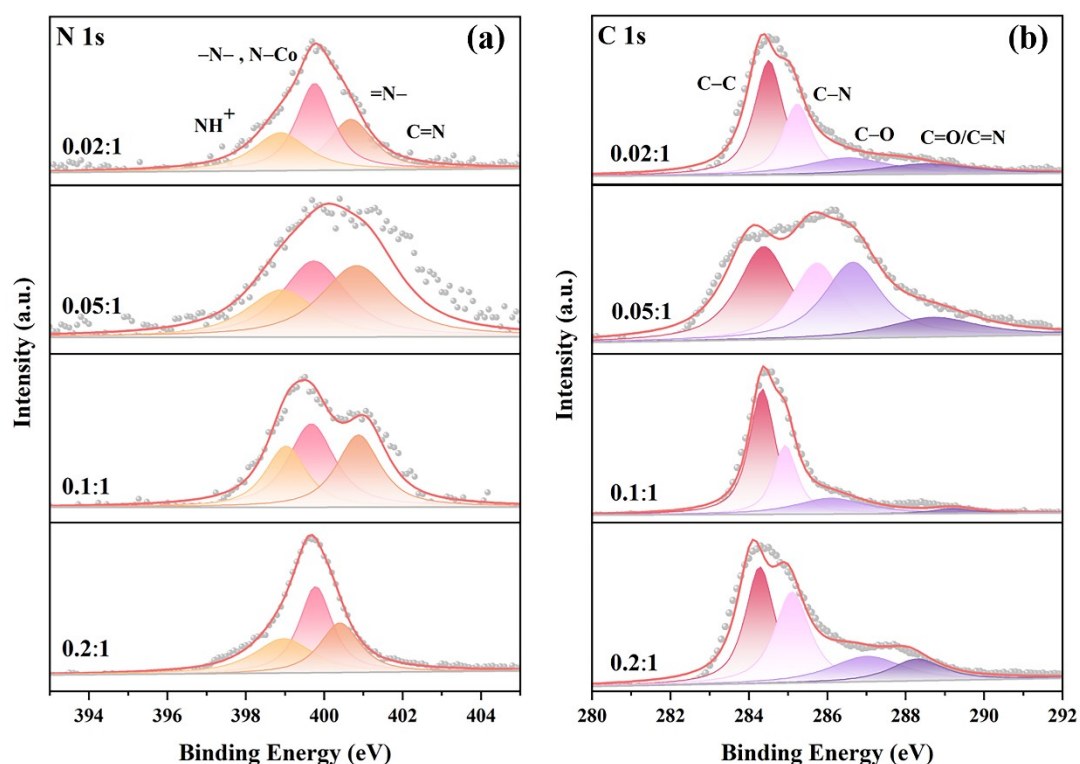

**Fig. S1** High resolution XPS spectra of (a) N 1s and (b) C 1s for PPy@Co<sub>3</sub>O<sub>4</sub> catalysts.

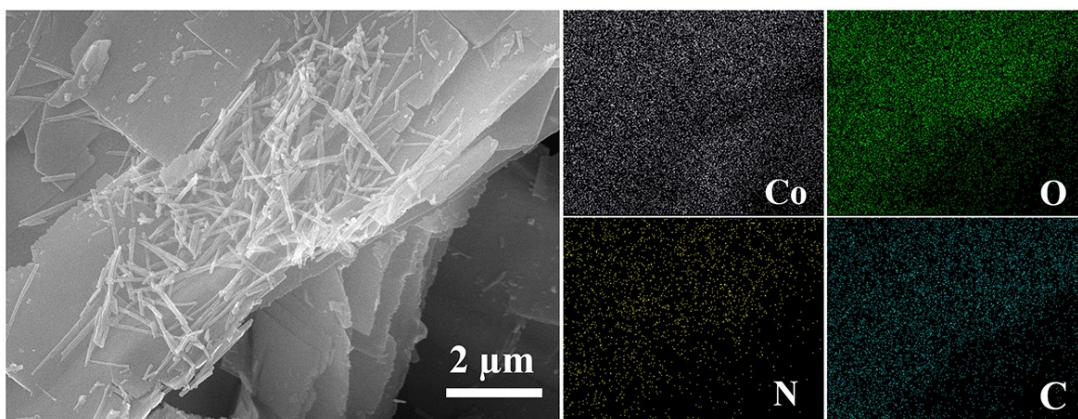

**Fig. S2** SEM and corresponding elemental mapping of PPy@Co<sub>3</sub>O<sub>4</sub> composite, revealing the elemental distributions of Co, O, N, and C.

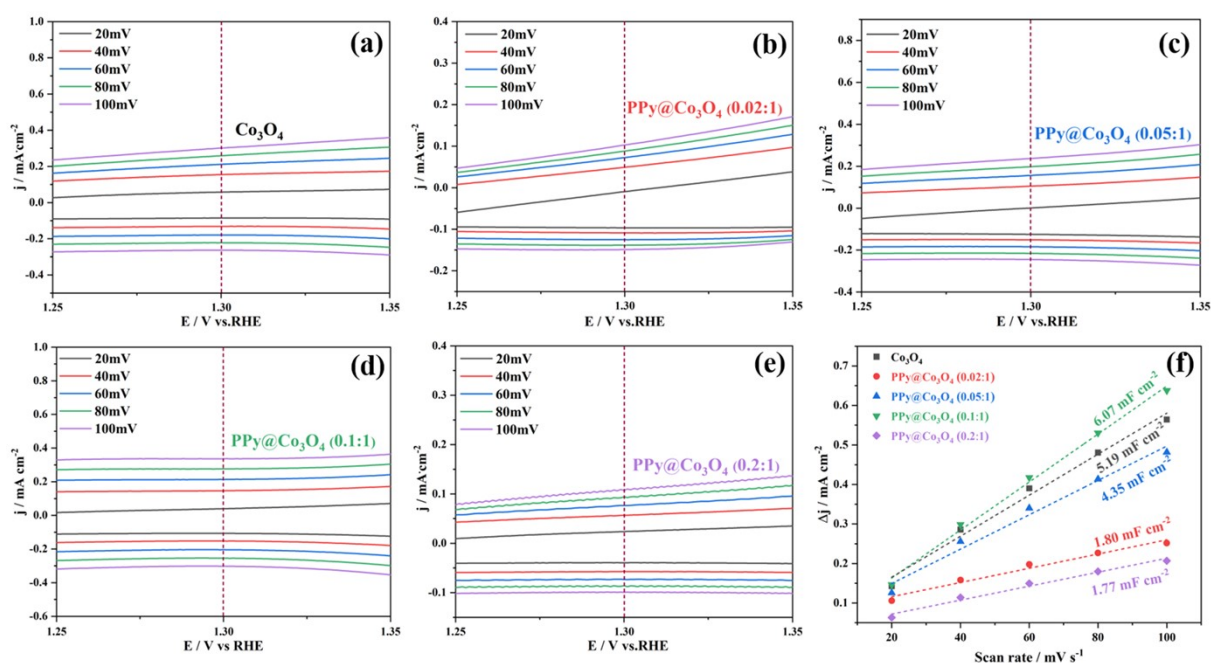

**Fig. S3** (a)-(e) CV curves of composites obtained with different scan rates (20~100 mV s<sup>-1</sup>) between a potential range of 1.25~1.35 V, (f) Relation curves between current density and scanning speed at 1.3 V

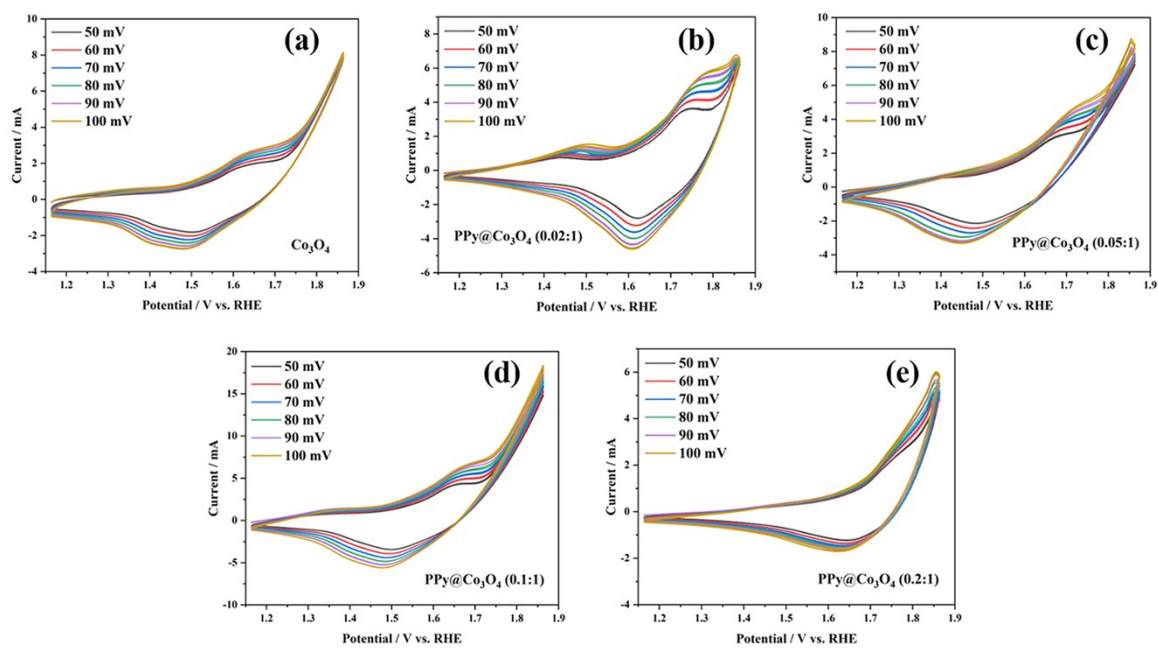

**Fig. S4** CV curves of  $\text{Co}_3\text{O}_4$  and  $\text{PPy}@ \text{Co}_3\text{O}_4$  composites obtained with different scan rates
